# Supplementary material
Source: PubMed Central journal article supplement (PMC4411249)

# Wild-type conventional ddPCR

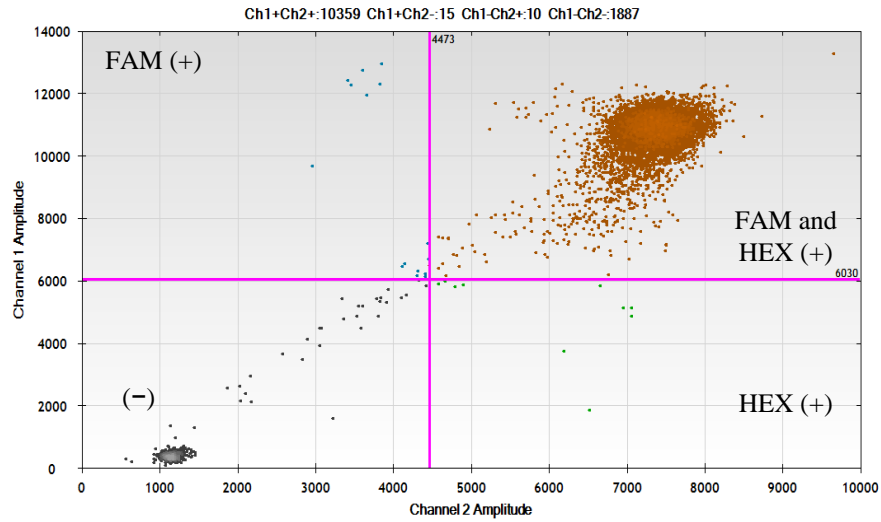

# 100% p.T790M conventional ddPCR

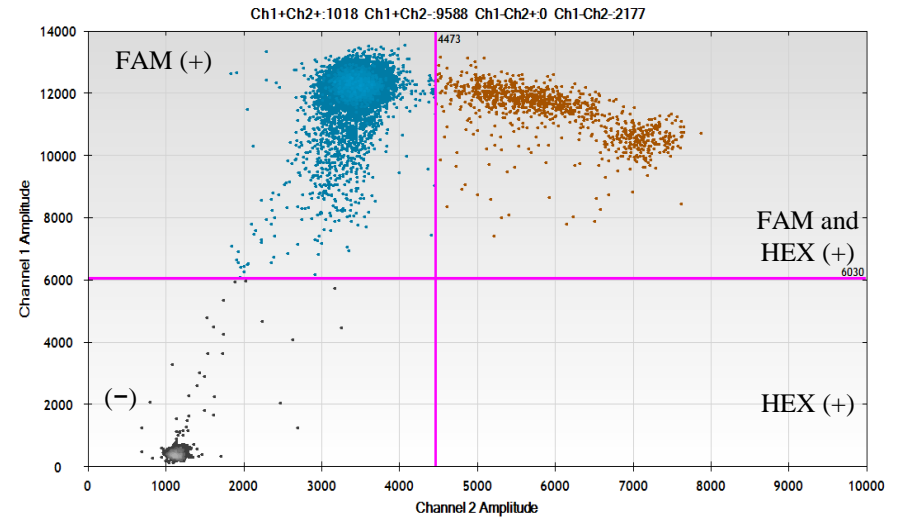

# 3.13% p.T790M conventional ddPCR

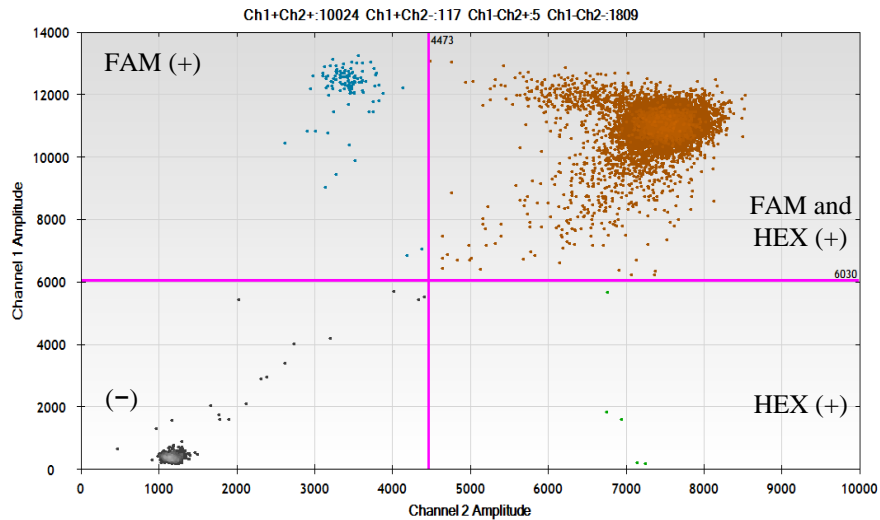

# 1.48% p.T790M conventional ddPCR

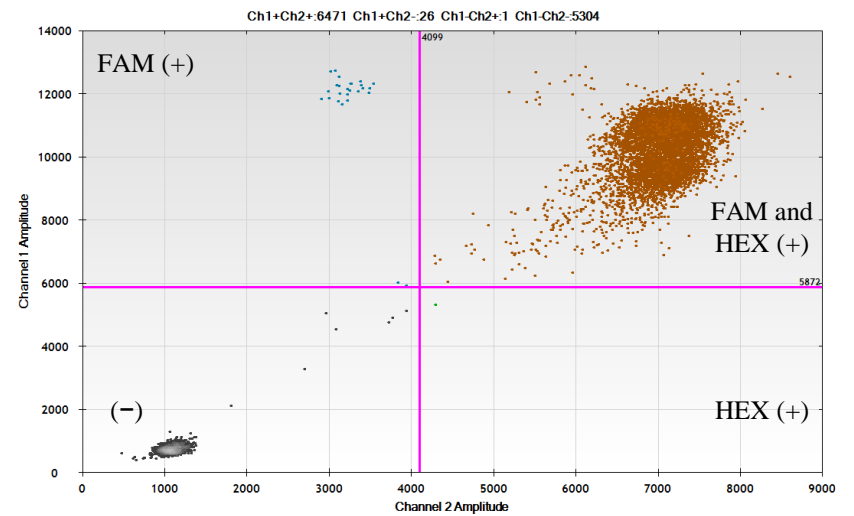

Supplement: mmc3.pdf [file mmc3.pdf]
