# Supplementary material
Source: PubMed Central journal article supplement (PMC4411249)

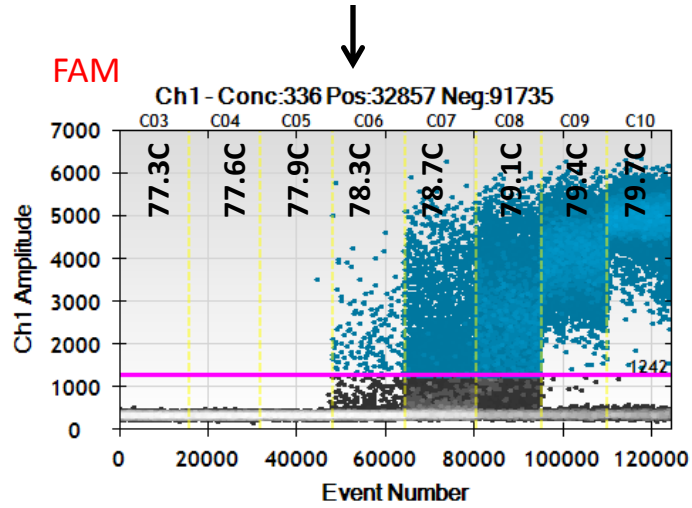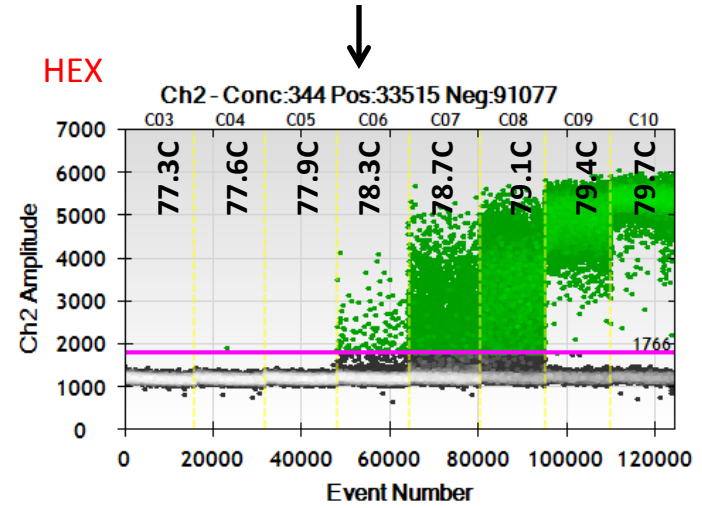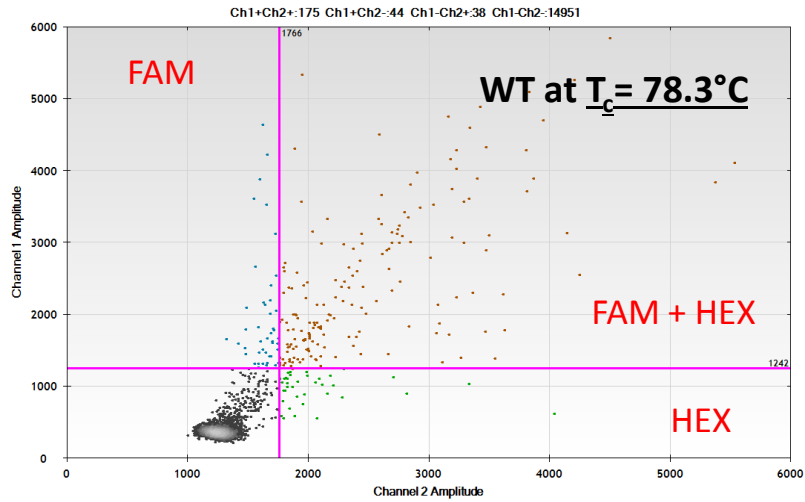

Supplement: mmc1.pdf [file mmc1.pdf]

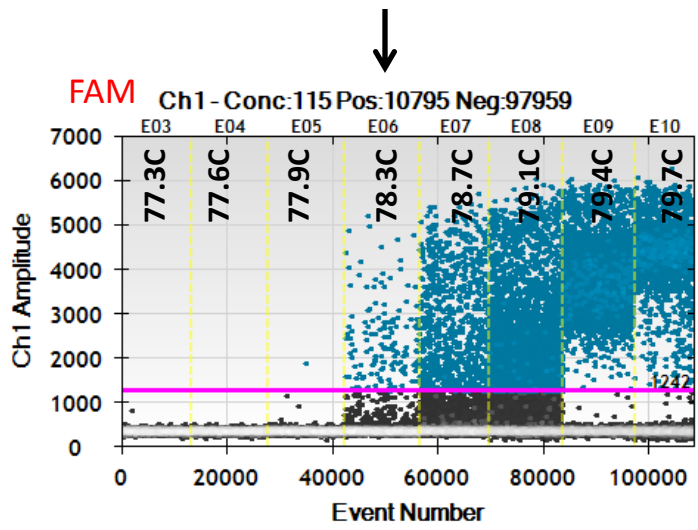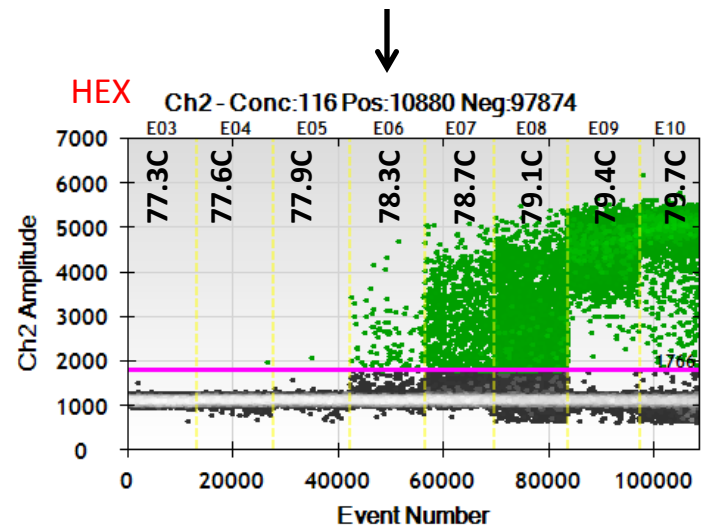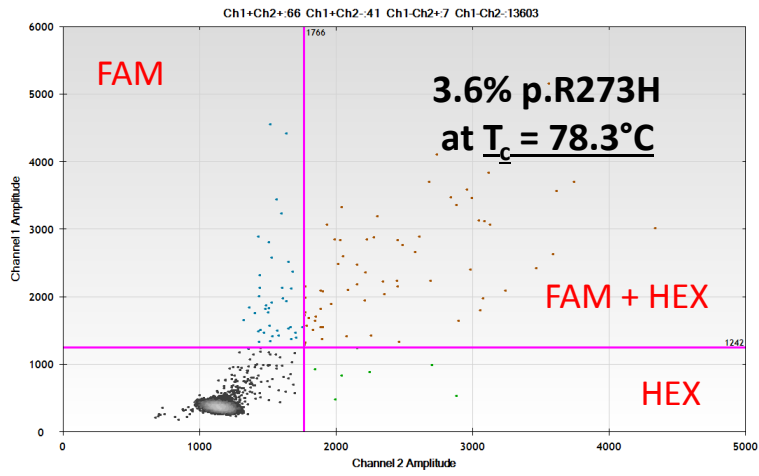

Supplement: mmc2.pdf [file mmc2.pdf]

# Wild-type COLD-ddPCR

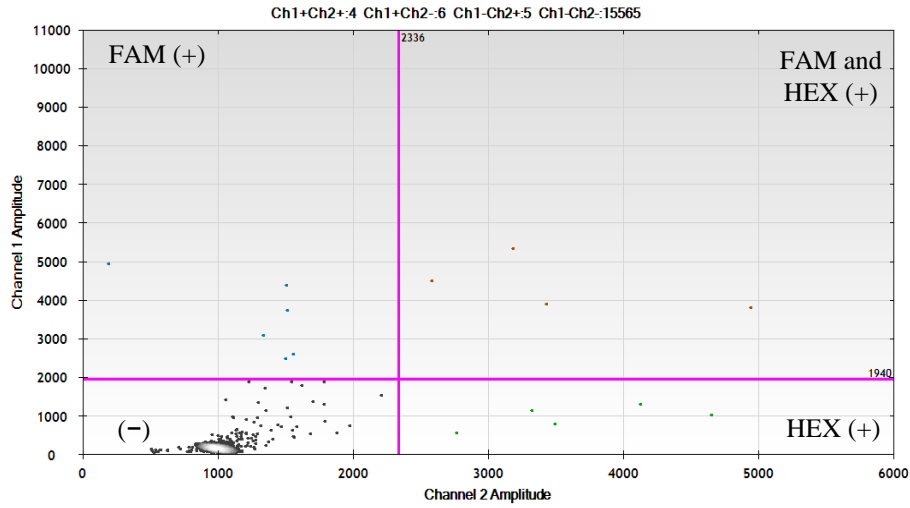

# 5% p.T790M COLD-ddPCR

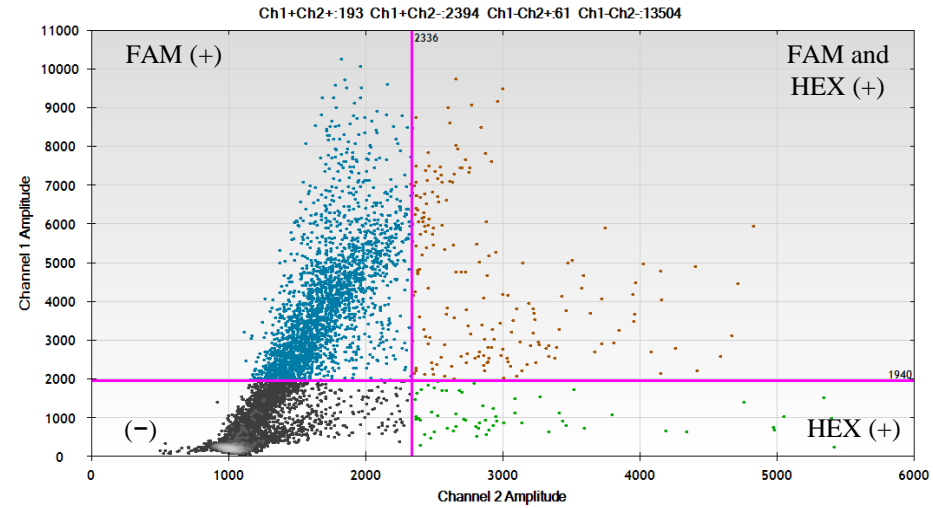

# 1.25% p.T790M COLD-ddPCR

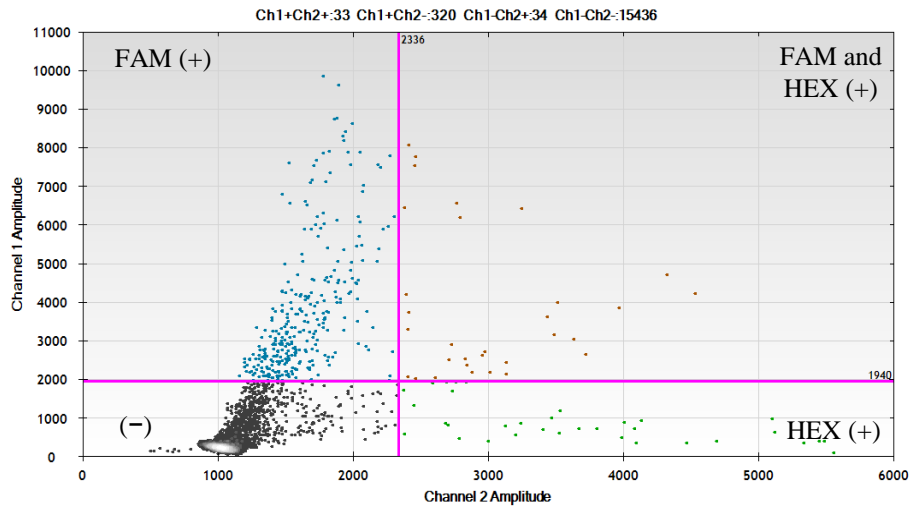

# 0.3% p.T790M COLD-ddPCR

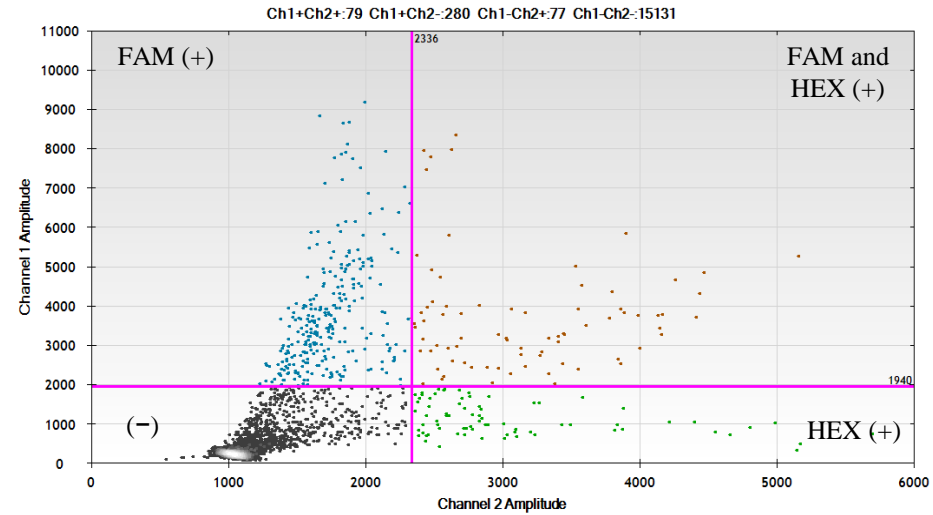

Supplement: mmc4.pdf [file mmc4.pdf]

**A**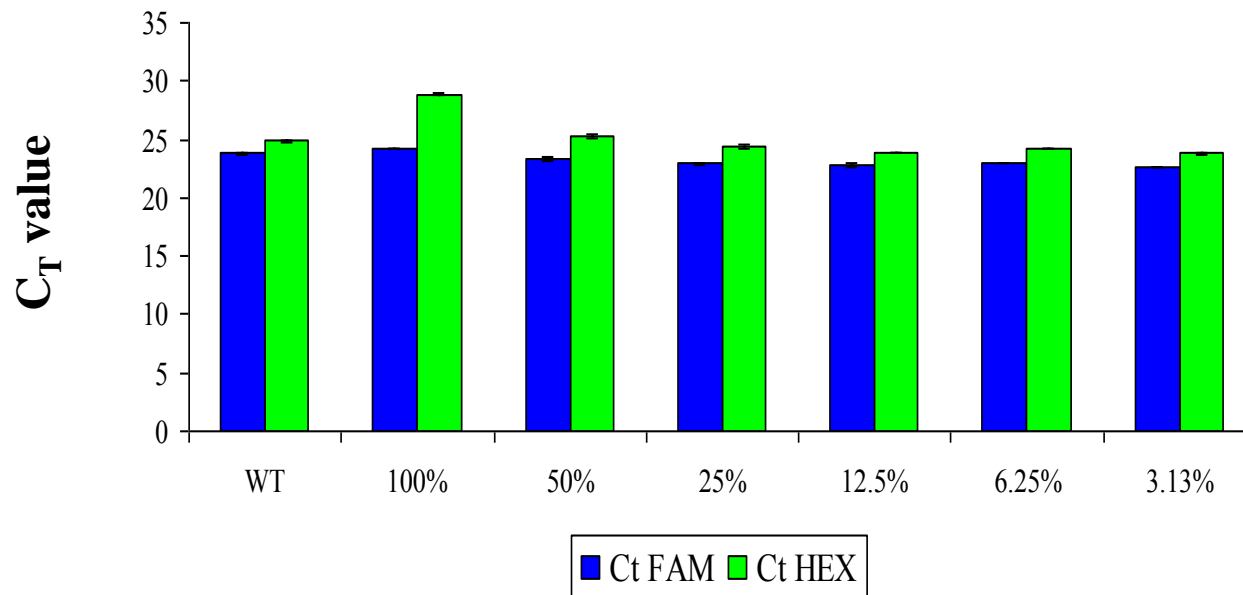**B**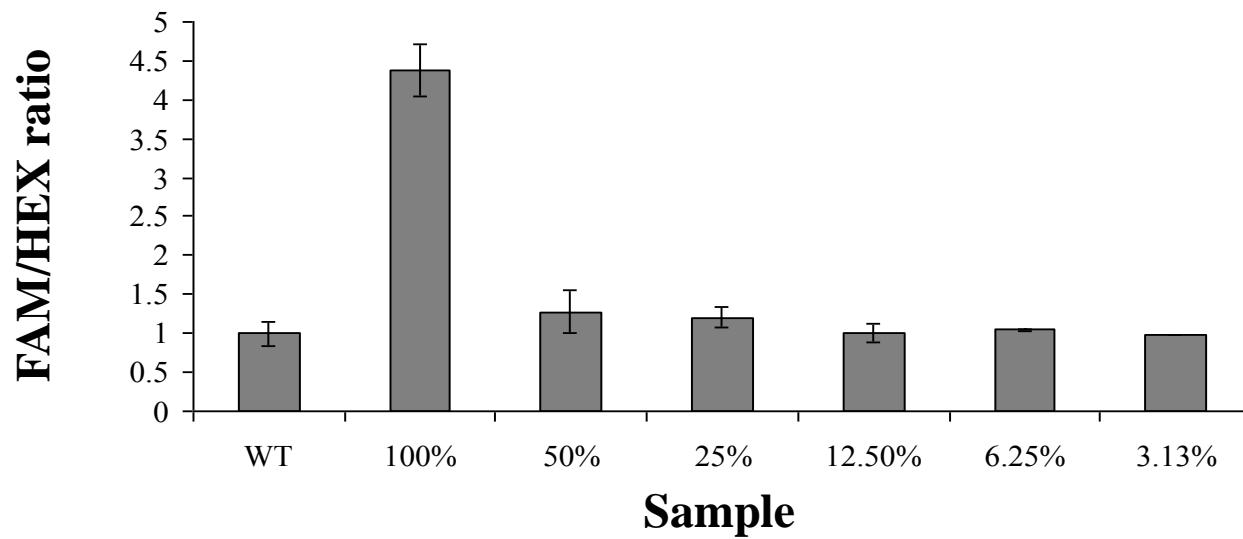

Supplement: mmc5.pdf [file mmc5.pdf]
